# Supplementary material
Source: ML conference proceedings conference paper supplement (https://proceedings.neurips.cc/paper_files/paper/2018/hash/e06f967fb0d355592be4e7674fa31d26-Abstract.html)
Supplement: Supplementary file [file e06f967fb0d355592be4e7674fa31d26-Supplemental.zip]

---

# Acceleration through Optimistic No-Regret Dynamics (Appendix)

---

**Jun-Kun Wang**  
College of Computing  
Georgia Institute of Technology  
Atlanta, GA 30313  
jimwang@gatech.edu

**Jacob Abernethy**  
College of Computing  
Georgia Institute of Technology  
Atlanta, GA 30313  
prof@gatech.edu

## A Two key lemmas

**Lemma 4** *Let the sequence of  $x_t$ 's be chosen according to MIRRORDESCENT. Assume that the Bregman Divergence is uniformly bounded on  $\mathcal{K}$ , so that  $D = \sup_{t=1,\dots,T} V_{x_t}(x^*)$ , where  $x^*$  denotes the minimizer of  $f(\cdot)$ . Assume that the sequence  $\{\gamma_t\}_{t=1,2,\dots}$  is non-increasing. Then we have  $\alpha\text{-REG}^x \leq \frac{D}{\gamma_T} - \sum_{t=1}^T \frac{1}{2\gamma_t} \|x_{t-1} - x_t\|^2$ .*

*Proof.* The key inequality we need, which can be found in Lemma 1 of [5] (and for completeness is included in Appendix A) is as follows: let  $y, c$  be arbitrary, and assume  $x^+ = \operatorname{argmin}_{x \in \mathcal{K}} \langle x, y \rangle + V_c(x)$ , then for any  $x^* \in \mathcal{K}$ ,  $\langle x^+ - x^*, y \rangle \leq V_c(x^*) - V_{x^+}(x^*) - V_c(x^+)$ . Now apply this fact for  $x^+ = x_t$ ,  $y = \gamma_t \alpha_t y_t$  and  $c = x_{t-1}$ , which provides

$$\langle x_t - x^*, \gamma_t \alpha_t y_t \rangle \leq V_{x_{t-1}}(x^*) - V_{x_t}(x^*) - V_{x_{t-1}}(x_t). \quad (1)$$

So, the weighted regret of the x-player can be bounded by

$$\begin{aligned} \alpha\text{-REG}^x &:= \sum_{t=1}^T \alpha_t \langle x_t - x^*, y_t \rangle \stackrel{(1)}{\leq} \sum_{t=1}^T \frac{1}{\gamma_t} (V_{x_{t-1}}(x^*) - V_{x_t}(x^*) - V_{x_{t-1}}(x_t)) \\ &= \frac{1}{\gamma_1} V_{x_0}(x^*) - \frac{1}{\gamma_T} V_{x_T}(x^*) + \sum_{t=1}^{T-1} \left( \frac{1}{\gamma_{t+1}} - \frac{1}{\gamma_t} \right) V_{x_t}(x^*) - \frac{1}{\gamma_t} V_{x_{t-1}}(x_t) \\ &\stackrel{(a)}{\leq} \frac{1}{\gamma_1} D + \sum_{t=1}^{T-1} \left( \frac{1}{\gamma_{t+1}} - \frac{1}{\gamma_t} \right) D - \frac{1}{\gamma_t} V_{x_{t-1}}(x_t) = \frac{D}{\gamma_T} - \sum_{t=1}^T \frac{1}{\gamma_t} V_{x_{t-1}}(x_t) \\ &\stackrel{(b)}{\leq} \frac{D}{\gamma_T} - \sum_{t=1}^T \frac{1}{2\gamma_t} \|x_{t-1} - x_t\|^2, \end{aligned} \quad (2)$$

where (a) holds since the sequence  $\{\gamma_t\}$  is non-increasing and  $D$  upper bounds the divergence terms, and (b) follows from the strong convexity of  $\phi$ , which grants  $V_{x_{t-1}}(x_t) \geq \frac{1}{2} \|x_t - x_{t-1}\|^2$ .  $\square$

The above lemma requires a bound  $D$  on the divergence terms  $V_{x_t}(x^*)$ , which might be large in certain unconstrained settings – recall that we do not necessarily require that  $\mathcal{K}$  is a bounded set, we only assume that  $f(\cdot)$  is minimized at a point with finite norm. On the other hand, when the x-player's learning rate  $\gamma$  is fixed, we can define the more natural choice  $D = V_{x_0}(x^*)$ .

**Lemma 4 [Alternative]:** *Let the sequence of  $x_t$ 's be chosen according to MIRRORDESCENT, and assume  $\gamma_t = \gamma$  for all  $t$ . Let  $D = V_{x_0}(x^*)$ , where  $x^*$  denotes the benchmark in  $\alpha\text{-REG}^x$ . Then we have  $\alpha\text{-REG}^x \leq \frac{D}{\gamma} - \sum_{t=1}^T \frac{1}{2\gamma} \|x_{t-1} - x_t\|^2$ .*

*Proof.* The proof follows exactly as before, yet  $\gamma_t = \gamma_{t+1}$  for all  $t$  implies that  $\frac{1}{\gamma_{t+1}} - \frac{1}{\gamma_t} = 0$  and we may drop the sum in the third line of (2). The rest of the proof is identical.  $\square$

**Lemma 1 of [5]:** Let  $x' = \arg \min_{x \in \mathcal{K}} \langle x, y \rangle + V_c(x)$ . Then, it satisfies that for any  $x^* \in \mathcal{K}$ ,

$$\langle x' - x^*, y \rangle \leq V_c(x^*) - V_{x'}(x^*) - V_c(x'). \quad (3)$$

*Proof.* Recall that the Bregman divergence with respect to the distance generating function  $\phi(\cdot)$  at a point  $c$  is:  $V_c(x) := \phi(x) - \langle \nabla \phi(c), x - c \rangle - \phi(c)$ .

Denote  $F(x) := \langle x, y \rangle + V_c(x)$ . Since  $x'$  is the optimal point of  $\arg \min_{x \in K} F(x)$ , by optimality,  $\langle x^* - x', \nabla F(x') \rangle \geq 0$ , for any  $x^* \in K$ . So,

$$\begin{aligned} \langle x^* - x', \nabla F(x') \rangle &= \langle x^* - x', y \rangle + \langle x^* - x', \nabla \phi(x') - \nabla \phi(c) \rangle \\ &= \langle x^* - x', y \rangle + \{\phi(x^*) - \langle \nabla \phi(c), x^* - c \rangle - \phi(c)\} - \{\phi(x^*) - \langle \nabla \phi(x'), x^* - x' \rangle - \phi(x')\} \\ &\quad - \{\phi(x') - \langle \nabla \phi(c), x' - c \rangle - \phi(c)\} \\ &= \langle x^* - x', y \rangle + V_c(x^*) - V_{x'}(x^*) - V_c(x') \geq 0. \end{aligned} \quad (4)$$

The last inequality means that

$$\langle x' - x^*, y \rangle \leq V_c(x^*) - V_{x'}(x^*) - V_c(x'). \quad (5)$$

□

## B Proof of Theorem 4

**Theorem 4** Algorithm 3 with  $\theta = \frac{1}{4L}$  is equivalent to Algorithm 2 with  $\gamma_t = \frac{(t+1)}{t} \frac{1}{8L}$  in the sense that they generate equivalent sequences of iterates:

$$\text{for all } t = 1, 2, \dots, T, \quad w_t = \bar{x}_t \quad \text{and} \quad z_{t-1} = \tilde{x}_t.$$

*Proof.* First, let us check the base case to see if  $w_1 = \bar{x}_1$ . We have that  $w_1 = z_0 - \theta \nabla f(z_0)$  from line 3 of Algorithm 3, while  $\bar{x}_1 = \bar{x}_0 - \frac{1}{4L} \nabla f(\bar{x}_1)$  in (11). Thus, if the initialization is the same:  $w_0 = z_0 = x_0 = \bar{x}_0 = \tilde{x}_1$ , then  $w_1 = \bar{x}_1$ .

Now assume that  $w_{t-1} = \bar{x}_{t-1}$  holds for a  $t \geq 2$ . Then, from the expression of line 4 that  $z_{t-1} = w_{t-1} + \frac{t-2}{t+1}(w_{t-1} - w_{t-2})$ , we get  $z_{t-1} = \bar{x}_{t-1} + \frac{t-2}{t+1}(\bar{x}_{t-1} - \bar{x}_{t-2})$ . Let us analyze that the r.h.s of the equality. The coefficient of  $x_{t-1}$  in  $\bar{x}_{t-1} + \frac{t-2}{t+1}(\bar{x}_{t-1} - \bar{x}_{t-2})$  is  $\frac{(t-1) + \frac{t-2}{t+1}(t-1)}{A_{t-1}} = \frac{2(1 + \frac{t-2}{t+1})}{t} = \frac{2(2t-1)}{t(t+1)}$ , while the coefficient of each  $x_\tau$  for any  $\tau \leq t-2$  in  $\bar{x}_{t-1} + \frac{t-2}{t+1}(\bar{x}_{t-1} - \bar{x}_{t-2})$  is  $\frac{(1 + \frac{t-2}{t+1})\tau}{A_{t-1}} - \frac{t-2}{t+1} \frac{\tau}{A_{t-2}} = \left\{ \frac{2(2t-1)}{(t-1)t(t+1)} - \frac{2}{(t+1)(t-1)} \right\} \times \tau = \left\{ \frac{2}{(t-1)(t+1)} \left( \frac{2t-1}{t} - 1 \right) \right\} \times \tau = \frac{2\tau}{t(t+1)}$ . Yet, the coefficient of  $x_{t-1}$  in  $\tilde{x}_t$  is  $\frac{t+(t-1)}{A_t} = \frac{2(2t-1)}{t(t+1)}$  and the coefficient of  $x_\tau$  in  $\tilde{x}_t$  is  $\frac{\tau}{A_t} = \frac{2\tau}{t(t+1)}$  for any  $\tau \leq t-2$ . Thus,  $z_{t-1} = \tilde{x}_t$ . Now observe that if  $z_{t-1} = \tilde{x}_t$ , we get  $w_t = \bar{x}_t$ . To see this, substituting  $z_{t-1} = w_{t-1} + \frac{t-2}{t+1}(w_{t-1} - w_{t-2})$  of line 4 into line 3, we get  $w_t = w_{t-1} + \frac{t-2}{t+1}(w_{t-1} - w_{t-2}) - \theta \nabla f(z_{t-1})$ . By using  $z_{t-1} = \tilde{x}_t$  and  $w_{t-1} = \bar{x}_{t-1}$ , we further get  $w_t = \bar{x}_{t-1} + \frac{t-2}{t+1}(\bar{x}_{t-1} - \bar{x}_{t-2}) - \theta \nabla f(\tilde{x}_t) = \bar{x}_t$ . We can repeat the argument to show that the correspondence holds for any  $t$ , which establishes the equivalency.

Notice that the choice of decreasing sequence  $\{\gamma_t\}$  here can still make the distance terms in (10) cancel out. So, we get  $O(1/T^2)$  rate by the guarantee. □

## C Proof of Theorem 5

**Theorem 5** Let  $\alpha_t = t$ . Assume  $\mathcal{K} = \mathbb{R}^n$ . Also, let  $\gamma_t = O(\frac{1}{L})$ . The output  $\bar{x}_T$  of Algorithm 4 is an  $O(\frac{1}{T})$ -approximate optimal solution of  $\min_x f(x)$ .

*Proof.* To analyze the guarantee of  $\bar{x}_T$  of Algorithm 4, we use the following lemma about FOLLOWTHELEADER for strongly convex loss functions.

**Corollary 1 from [3]** *Let  $\ell_1, \dots, \ell_T$  be a sequence of functions such that for all  $t \in [T]$ ,  $\ell_t$  is  $\sigma_t$ -strongly convex. Assume that FOLLOWTHELEADER runs on this sequence and for each  $t \in [T]$ , let  $\theta_t$  be in  $\nabla \ell_t(y_t)$ . Then,  $\sum_{t=1}^T \ell_t(y_t) - \min_x \sum_{t=1}^T \ell_t(y) \leq \frac{1}{2} \sum_{t=1}^T \frac{\|\theta_t\|^2}{\sum_{\tau=1}^t \sigma_\tau}$*

Observe that the  $y$ -player plays FOLLOWTHELEADER on the loss function sequence  $\alpha_t \ell_t(y) := \alpha_t(-\langle x_t, y \rangle + f^*(y))$ , whose strong convexity parameter is  $\frac{\alpha_t}{L}$  (due to  $f^*(y)$  is  $\frac{1}{L}$ -strongly convex by duality). Also,  $\nabla \ell_t(y_t) = -x_t + \nabla f^*(y_t) = -x_t + \bar{x}_{t-1}$ , where the last inequality is due to that if  $y_t = \arg\max_y \langle \frac{1}{A_{t-1}} \sum_{s=1}^{t-1} \alpha_s x_s, y \rangle - f^*(y) = \nabla f(\bar{x}_{t-1})$ , then  $\bar{x}_{t-1} = \nabla f^*(y_t)$  by duality. So, we have  $\overline{\alpha\text{-REG}}^y \stackrel{\text{AboveCor.}}{\leq} \frac{1}{2A_T} \sum_{t=1}^T \frac{\alpha_t^2 \|\bar{x}_{t-1} - x_t\|^2}{\sum_{\tau=1}^t \alpha_\tau (1/L)} = \frac{1}{2A_T} \sum_{t=1}^T \frac{\alpha_t^2 L \|\bar{x}_{t-1} - x_t\|^2}{A_t} = O(\sum_{t=1}^T \frac{L \|\bar{x}_{t-1} - x_t\|^2}{A_t})$ . For the  $x$ -player, it is an instance of MIRRORDESCENT, so  $\overline{\alpha\text{-REG}}^x := \frac{1}{A_T} \sum_{t=1}^T \langle x_t - x^*, \alpha_t y_t \rangle \leq \frac{\frac{1}{\gamma_T} D - \sum_{t=1}^T \frac{1}{2\gamma_t} \|x_{t-1} - x_t\|^2}{A_T}$ . Therefore,  $\bar{x}_T$  of Algorithm 4 is an  $\overline{\alpha\text{-REG}}^x + \overline{\alpha\text{-REG}}^y = O(\frac{L \sum_{t=1}^T (\|\bar{x}_{t-1} - x_t\|^2 - \|x_t - x_{t-1}\|^2)}{A_T})$ -approximate optimal solution. Since the distance terms may not cancel out, one may only bound the differences of the distance terms by a constant, which leads to the non-accelerated  $O(1/T)$  rate.  $\square$

## D Proof of Theorem 6

**Theorem 6** *Let  $\alpha_t = t$ . Algorithm 5 with update by option (A) is the case when the  $y$ -player uses OPTIMISTICFTL and the  $x$ -player adopts MIRRORDESCENT with  $\gamma_t = \frac{1}{4L}$  in Fenchel game. Therefore,  $w_T$  is an  $O(\frac{1}{T^2})$ -approximate optimal solution of  $\min_{x \in \mathcal{K}} f(x)$ .*

*Proof.* We first prove by induction showing that  $w_t$  in Algorithm 5 is  $\sum_{s=1}^t \frac{\alpha_s}{A_t} x_s$  for any  $t > 0$ . For the base case  $t = 1$ , we have  $w_1 = (1 - \beta_1)w_0 + \beta_1 x_1 = x_1 = \frac{\alpha_1}{A_1} x_1$ . Now suppose that the equivalency holds at  $t - 1$ , for a  $t \geq 2$ . Then,

$$\begin{aligned} w_t &= (1 - \beta_t)w_{t-1} + \beta_t x_t \stackrel{(a)}{=} (1 - \beta_t)(\sum_{s=1}^{t-1} \frac{\alpha_s}{A_{t-1}} x_s) + \beta_t x_t \\ &= (1 - \frac{2}{t+1})(\sum_{s=1}^{t-1} \frac{\alpha_s}{\frac{t(t-1)}{2}} x_s) + \beta_t x_t = \sum_{s=1}^{t-1} \frac{\alpha_s}{\frac{t(t+1)}{2}} x_s + \frac{\alpha_t}{A_t} x_t = \sum_{s=1}^t \frac{\alpha_s}{A_s} x_s, \end{aligned} \quad (6)$$

where (a) is by induction. So, it holds at  $t$  too. Now we are going to show that  $z_t = \frac{1}{A_t}(\alpha_t x_{t-1} + \sum_{s=1}^{t-1} \alpha_s x_s) = \tilde{x}_t$ . We have that  $z_t = (1 - \beta_t)w_{t-1} + \beta_t x_{t-1} = (1 - \beta_t)(\sum_{s=1}^{t-1} \frac{\alpha_s}{A_{t-1}} x_s) + \beta_t x_{t-1} = (1 - \frac{2}{t+1})(\sum_{s=1}^{t-1} \frac{\alpha_s}{\frac{t(t-1)}{2}} x_s) + \beta_t x_{t-1} = \sum_{s=1}^{t-1} \frac{\alpha_s}{\frac{t(t+1)}{2}} x_s + \beta_t x_{t-1} = \sum_{s=1}^{t-1} \frac{\alpha_s}{A_t} x_s + \frac{\alpha_t}{A_t} x_{t-1} = \tilde{x}_t$ .

The result also means that  $\nabla f(z_t) = \nabla f(\tilde{x}_t) = y_t$  of the  $y$ -player who plays OPTIMISTIC-FTL in Algorithm 1. Furthermore, it shows that line 5 of Algorithm 5:  $x_t = \arg\min_{x \in \mathcal{K}} \gamma'_t \langle \nabla f(z_t), x \rangle + V_{x_{t-1}}(x)$  is exactly (9) of MIRRORDESCENT in Fenchel game. Also, from (6), the last iterate  $w_T$  in Algorithm 5 corresponds to the final output of our accelerated solution to Fenchel game, which is the weighted average point that enjoys the guarantee by the game analysis.  $\square$

## E Proof of Theorem 7

**Theorem 7** *Let  $\alpha_t = t$ . Algorithm 5 with update by option (B) is the case when the  $y$ -player uses OPTIMISTICFTL and the  $x$ -player adopts BETHEREGULARIZEDLEADER with  $\eta = \frac{1}{4L}$  in Fenchel game. Therefore,  $w_T$  is an  $O(\frac{1}{T^2})$ -approximate optimal solution of  $\min_{x \in \mathcal{K}} f(x)$ .*

*Proof.* Consider in Fenchel game that the  $y$ -player uses OPTIMISTICFTL while the  $x$ -player plays according to BTRL:

$$x_t = \arg\min_{x \in \mathcal{K}} \sum_{t=1}^T \langle x_t, \alpha_t y_t \rangle + \frac{1}{\eta} R(x),$$

where  $R(\cdot)$  is a 1-strongly convex function. Define,  $z = \arg \min_{x \in \mathcal{K}} R(x)$ . Form [1] (also see Appendix F), it shows that BTRL has regret

$$\text{Regret} := \sum_{t=1}^T \langle x_t - x^*, \alpha_t y_t \rangle \leq \frac{R(x^*) - R(z) - \frac{1}{2} \sum_{t=1}^T \|x_t - x_{t-1}\|^2}{\eta}, \quad (7)$$

where  $x^*$  is the benchmark/comparator defined in the definition of the weighted regret (4).

By combining (8) and (7), we get that

$$\frac{\alpha \cdot \text{REG}^x + \alpha \cdot \text{REG}^y}{A_T} = \frac{\frac{R(x^*) - R(z)}{\eta} + \sum_{t=1}^T (\frac{\alpha_t^2}{A_t} L - \frac{1}{2\eta}) \|x_{t-1} - x_t\|^2}{A_T} \leq O\left(\frac{L(R(x^*) - R(z))}{T^2}\right), \quad (8)$$

where the last inequality is because  $\eta = \frac{1}{4L}$  so that the distance terms cancel out. So, by Lemma 1 and Theorem 1 again, we know that  $\bar{x}_T$  is an  $O(\frac{1}{T^2})$ -approximate optimal solution of  $\min_{x \in \mathcal{K}} f(x)$ .

The remaining thing to do is showing that  $\bar{x}_T$  is actually  $w_T$  of Algorithm 5 with option (B). But, this follows the same line as the proof of Theorem 6. So, we have completed the proof.  $\square$

## F Proof of BETHEREGULARIZEDLEADER's regret

For completeness, we replicate the proof in [1] about the regret bound of BETHEREGULARIZEDLEADER in this section.

**Theorem 10** of [[1]] *Let  $\theta_t$  be the loss vector in round  $t$ . Let the update of BTRL be  $x_t = \arg \min_{x \in \mathcal{K}} \langle x, L_t \rangle + \frac{1}{\eta} R(x)$ , where  $R(\cdot)$  is  $\beta$ -strongly convex. Denote  $z = \arg \min_{x \in \mathcal{K}} R(x)$ . Then, BTRL has regret*

$$\text{Regret} := \sum_{t=1}^T \langle x_t - x^*, \theta_t \rangle \leq \frac{R(x^*) - R(z) - \frac{\beta}{2} \sum_{t=1}^T \|x_t - x_{t-1}\|^2}{\eta}. \quad (9)$$

To analyze the regret of BETHEREGULARIZEDLEADER, let us consider OPTIMISTICFTRL first. Let  $\theta_t$  be the loss vector in round  $t$  and let the cumulative loss vector be  $L_t = \sum_{s=1}^t \theta_s$ . The update of OPTIMISTICFTRL is

$$x_t = \arg \min_{x \in \mathcal{K}} \langle x, L_{t-1} + m_t \rangle + \frac{1}{\eta} R(x), \quad (10)$$

where  $m_t$  is the learner's guess of the loss vector in round  $t$ ,  $R(\cdot)$  is  $\beta$ -strong convex with respect to a norm ( $\|\cdot\|$ ) and  $\eta$  is a parameter. Therefore, it is clear that the regret of BETHEREGULARIZEDLEADER will be the one when OPTIMISTICFTRL's guess of the loss vectors exactly match the true ones, i.e.  $m_t = \theta_t$ .

**Theorem 16** of [[1]] *Let  $\theta_t$  be the loss vector in round  $t$ . Let the update of OPTIMISTICFTRL be  $x_t = \arg \min_{x \in \mathcal{K}} \langle x, L_{t-1} + m_t \rangle + \frac{1}{\eta} R(x)$ , where  $m_t$  is the learner's guess of the loss vector in round  $t$  and  $R(x)$  is a  $\beta$ -strongly convex function. Denote the update of standard FTRL as  $z_t = \arg \min_{x \in \mathcal{K}} \langle x, L_{t-1} \rangle + \frac{1}{\eta} R(x)$ . Also,  $z_1 = \arg \min_{x \in \mathcal{K}} R(x)$ . Then, OPTIMISTICFTRL (10) has regret*

$$\text{Regret} := \sum_{t=1}^T \langle x_t - x^*, \theta_t \rangle \leq \frac{R(x^*) - R(z_1) - D_T}{\eta} + \sum_{t=1}^T \frac{\eta}{\beta} \|\theta_t - m_t\|_*^2, \quad (11)$$

where  $D_T = \sum_{t=1}^T \frac{\beta}{2} \|x_t - z_t\|^2 + \frac{\beta}{2} \|x_t - z_{t+1}\|^2$ ,  $z_t = \arg \min_{x \in \mathcal{K}} \langle x, L_{t-1} \rangle + \frac{1}{\eta} R(x)$ , and  $x_t = \arg \min_{x \in \mathcal{K}} \langle x, L_{t-1} + m_t \rangle + \frac{1}{\eta} R(x)$ .

Recall that the update of BETHEREGULARIZEDLEADER is  $x_t = \arg \min_{x \in \mathcal{K}} \langle x, L_t \rangle + \frac{1}{\eta} R(x)$ . Therefore, we have that  $m_t = \theta_t$  and  $x_t = z_{t+1}$  in the regret bound of OPTIMISTICFTRL indicated by the theorem. Consequently, we get that the regret of BETHEREGULARIZEDLEADER satisfies

$$\text{Regret} := \sum_{t=1}^T \langle x_t - x^*, \theta_t \rangle \leq \frac{R(x^*) - R(z) - \frac{\beta}{2} \sum_{t=1}^T \|x_t - x_{t-1}\|^2}{\eta}. \quad (12)$$

## G Proof of OPTIMISTICFTRL's regret

For completeness, we replicate the proof in [1] about the regret bound of OPTIMISTICFTRL in this section.

**Theorem 16** of [[1]] *Let  $\theta_t$  be the loss vector in round  $t$ . Let the update of OPTIMISTICFTRL be  $x_t = \arg \min_{x \in \mathcal{K}} \langle x, L_{t-1} + m_t \rangle + \frac{1}{\eta} R(x)$ , where  $m_t$  is the learner's guess of the loss vector in round  $t$  and  $R(x)$  is a  $\beta$ -strongly convex function. Denote the update of standard FTRL as  $z_t = \arg \min_{x \in \mathcal{K}} \langle x, L_{t-1} \rangle + \frac{1}{\eta} R(x)$ . Also,  $z_1 = \arg \min_{x \in \mathcal{K}} R(x)$ . Then, OPTIMISTICFTRL (10) has regret*

$$\text{Regret} := \sum_{t=1}^T \langle x_t - x^*, \theta_t \rangle \leq \frac{R(x^*) - R(z_1) - D_T}{\eta} + \sum_{t=1}^T \frac{\eta}{\beta} \|\theta_t - m_t\|_*^2, \quad (13)$$

where  $D_T = \sum_{t=1}^T \frac{\beta}{2} \|x_t - z_t\|^2 + \frac{\beta}{2} \|x_t - z_{t+1}\|^2$ ,  $z_t = \arg \min_{x \in \mathcal{K}} \langle x, L_{t-1} \rangle + \frac{1}{\eta} R(x)$ , and  $x_t = \arg \min_{x \in \mathcal{K}} \langle x, L_{t-1} + m_t \rangle + \frac{1}{\eta} R(x)$ .

*Proof.* Define  $z_t = \arg \min_{x \in \mathcal{K}} \langle x, L_{t-1} \rangle + \frac{1}{\eta} R(x)$  as the update of the standard FOLLOW-THE-REGULARIZED-LEADER. We can re-write the regret as

$$\text{Regret} := \sum_{t=1}^T \langle x_t - x^*, \theta_t \rangle = \sum_{t=1}^T \langle x_t - z_{t+1}, \theta_t - m_t \rangle + \sum_{t=1}^T \langle x_t - z_{t+1}, m_t \rangle + \langle z_{t+1} - x^*, \theta_t \rangle \quad (14)$$

Let us analyze the first sum

$$\sum_{t=1}^T \langle x_t - z_{t+1}, \theta_t - m_t \rangle. \quad (15)$$

Now using Lemma 17 of [1] (which is also stated below) with  $x_1 = x_t$ ,  $u_1 = \sum_{s=1}^{t-1} \theta_s + m_t$  and  $x_2 = z_{t+1}$ ,  $u_2 = \sum_{s=1}^t \theta_s$  in the lemma, we have

$$\sum_{t=1}^T \langle x_t - z_{t+1}, \theta_t - m_t \rangle \leq \sum_{t=1}^T \|x_t - z_{t+1}\| \|\theta_t - m_t\|_* \leq \sum_{t=1}^T \frac{\eta}{\beta} \|\theta_t - m_t\|_*^2. \quad (16)$$

For the other sum,

$$\sum_{t=1}^T \langle x_t - z_{t+1}, m_t \rangle + \langle z_{t+1} - x^*, \theta_t \rangle, \quad (17)$$

we are going to show that, for any  $T \geq 0$ , it is upper-bounded by  $\frac{R(x^*) - R(z_1) - D_T}{\eta}$ , which holds for any  $x^* \in \mathcal{K}$ , where  $D_T = \sum_{t=1}^T \frac{\beta}{2} \|x_t - z_t\|^2 + \frac{\beta}{2} \|x_t - z_{t+1}\|^2$ . For the base case  $T = 0$ , we see that

$$\sum_{t=1}^0 \langle x_t - z_{t+1}, m_t \rangle + \langle z_{t+1} - x^*, \theta_t \rangle = 0 \leq \frac{R(x^*) - R(z_1) - 0}{\eta}, \quad (18)$$

as  $z_1 = \arg \min_{x \in \mathcal{K}} R(x)$ .

Using induction, assume that it also holds for  $T - 1$  for a  $T \geq 1$ . Then, we have

$$\begin{aligned} & \sum_{t=1}^T \langle x_t - z_{t+1}, m_t \rangle + \langle z_{t+1}, \theta_t \rangle \\ & \stackrel{(a)}{\leq} \langle x_T - z_{T+1}, m_T \rangle + \langle z_{T+1}, \theta_T \rangle + \frac{R(z_T) - R(z_1) - D_{T-1}}{\eta} + \langle z_T, L_{T-1} \rangle \\ & \stackrel{(b)}{\leq} \langle x_T - z_{T+1}, m_T \rangle + \langle z_{T+1}, \theta_T \rangle + \frac{R(x_T) - R(z_1) - D_{T-1} - \frac{\beta}{2} \|x_T - z_T\|^2}{\eta} + \langle x_T, L_{T-1} \rangle \\ & = \langle z_{T+1}, \theta_T - m_T \rangle + \frac{R(x_T) - R(z_1) - D_{T-1} - \frac{\beta}{2} \|x_T - z_T\|^2}{\eta} + \langle x_T, L_{T-1} + m_T \rangle \\ & \stackrel{(c)}{\leq} \langle z_{T+1}, \theta_T - m_T \rangle + \frac{R(z_{T+1}) - R(z_1) - D_{T-1} - \frac{\beta}{2} \|x_T - z_T\|^2 - \frac{\beta}{2} \|x_T - z_{T+1}\|^2}{\eta} \\ & \quad + \langle z_{T+1}, L_{T-1} + m_T \rangle \\ & = \langle z_{T+1}, L_T \rangle + \frac{R(z_{T+1}) - R(z_1) - D_T}{\eta} \\ & \stackrel{(d)}{\leq} \langle x^*, L_T \rangle + \frac{R(x^*) - R(z_1) - D_T}{\eta}, \end{aligned} \quad (19)$$

where (a) is by induction such that the inequality holds at  $T - 1$  for any  $x^* \in \mathcal{K}$  including  $x^* = z_T$ , (b) and (c) are by strong convexity so that

$$\langle z_T, L_{T-1} \rangle + \frac{R(z_T)}{\eta} \leq \langle x_T, L_{T-1} \rangle + \frac{R(x_T)}{\eta} - \frac{\beta}{2\eta} \|x_T - z_T\|^2, \quad (20)$$

and

$$\langle x_T, L_{T-1} + m_T \rangle + \frac{R(x_T)}{\eta} \leq \langle z_{T+1}, L_{T-1} + m_T \rangle + \frac{R(z_{T+1})}{\eta} - \frac{\beta}{2\eta} \|x_T - z_{T+1}\|^2, \quad (21)$$

and (d) is because  $z_{T+1}$  is the optimal point of  $\arg \min_x \langle x, L_T \rangle + \frac{R(x)}{\eta}$ . We've completed the induction.  $\square$

**Lemma 17 of [[1]]** Denote  $x_1 = \operatorname{argmin}_x \langle x, u_1 \rangle + \frac{1}{\eta} R(x)$  and  $x_2 = \operatorname{argmin}_x \langle x, u_2 \rangle + \frac{1}{\eta} R(x)$  for a  $\beta$ -strongly convex function  $R(\cdot)$  with respect to a norm  $\|\cdot\|$ . We have  $\|x_1 - x_2\| \leq \frac{\eta}{\beta} \|u_1 - u_2\|_*$ .

## H Proof of Theorem 8

**Theorem 8** For the game  $g(x, y) := \langle x, y \rangle - \tilde{f}^*(y) + \frac{\mu\|x\|_2^2}{2}$ , if the  $y$ -player plays **OPTIMISTICFTL** and the  $x$ -player plays **BETHEREGULARIZEDLEADER**:  $x_t \leftarrow \arg \min_{x \in \mathcal{X}} \sum_{s=0}^t \alpha_s \ell_s(x)$ , where  $\alpha_0 \ell_0(x) := \alpha_0 \frac{\mu\|x\|_2^2}{2}$ , then the weighted average  $(\bar{x}_T, \bar{y}_T)$  would be  $O(\exp(-\frac{T}{\sqrt{\kappa}}))$ -approximate equilibrium of the game, where the weights  $\frac{\alpha_t}{\bar{A}_t} = \frac{1}{\sqrt{6\kappa}}$ . This implies that  $f(\bar{x}_T) - \min_{x \in \mathcal{X}} f(x) = O(\exp(-\frac{T}{\sqrt{\kappa}}))$ .

*Proof.* From Lemma 3, we know that the  $y$ -player's regret by **OPTIMISTICFTL** is

$$\begin{aligned}
\sum_{t=1}^T \alpha_t \ell_t(\tilde{y}_t) - \alpha_t \ell_t(y^*) &\leq \sum_{t=1}^T \delta_t(\tilde{y}_t) - \delta_t(\hat{y}_{t+1}) \\
&= \sum_{t=1}^T \alpha_t \langle x_{t-1} - x_t, \tilde{y}_t - \hat{y}_{t+1} \rangle \\
\text{(Eqns. 5, 6)} \quad &= \sum_{t=1}^T \alpha_t \langle x_{t-1} - x_t, \nabla \tilde{f}(\tilde{x}_t) - \nabla \tilde{f}(\bar{x}_t) \rangle \\
\text{(Hölder's Ineq.)} \quad &\leq \sum_{t=1}^T \alpha_t \|x_{t-1} - x_t\| \|\nabla \tilde{f}(\tilde{x}_t) - \nabla \tilde{f}(\bar{x}_t)\| \\
&= \sum_{t=1}^T \alpha_t \|x_{t-1} - x_t\| \|\nabla f(\tilde{x}_t) - \mu \tilde{x}_t - \nabla \tilde{f}(\bar{x}_t) + \mu \bar{x}_t\| \\
\text{(triangle inequality)} \quad &\leq \sum_{t=1}^T \alpha_t \|x_{t-1} - x_t\| (\|\nabla f(\tilde{x}_t) - \nabla \tilde{f}(\bar{x}_t)\| + \mu \|\bar{x}_t - \tilde{x}_t\|) \\
\text{(L-smoothness and } L \geq \mu) \quad &\leq 2L \sum_{t=1}^T \alpha_t \|x_{t-1} - x_t\| \|\tilde{x}_t - \bar{x}_t\| \\
\text{(Eqn. 7)} \quad &= 2L \sum_{t=1}^T \frac{\alpha_t^2}{\bar{A}_t} \|x_{t-1} - x_t\| \|x_{t-1} - x_t\|
\end{aligned}$$

Therefore,

$$\alpha\text{-REG}^y \leq 2L \sum_{t=1}^T \frac{\alpha_t^2}{\bar{A}_t} \|x_{t-1} - x_t\|^2. \quad (22)$$

For the  $x$ -player, its loss function in round  $t$  is  $\alpha_t \ell_t(x) := \alpha_t (\mu \phi(x) + \langle x, y_t \rangle)$ , where  $\phi(x) := \frac{1}{2} \|x\|_2^2$ . Assume the  $x$ -player plays **BETHEREGULARIZEDLEADER**,

$$x_t \leftarrow \arg \min_{x \in \mathcal{X}} \sum_{s=0}^t \alpha_s \ell_s(x), \quad (23)$$

where  $\alpha_0 \ell_0(x) := \alpha_0 \mu \phi(x)$ . Denote

$$\tilde{A}_t := \sum_{s=0}^t \alpha_s. \quad (24)$$

Notice that this is different from  $A_t := \sum_{s=1}^t \alpha_s$ . Then, its regret is (proof is on the next page)

$$\alpha\text{-REG}^x := \sum_{t=1}^T \alpha_t \ell_t(x_t) - \alpha_t \ell_t(x^*) \leq \alpha_0 \mu L_0 \|x^* - x_0\| - \sum_{t=1}^T \frac{\mu \tilde{A}_{t-1}}{2} \|x_{t-1} - x_t\|^2, \quad (25)$$

where  $L_0$  is the Lipschitz constant of the 1-strongly convex function  $\phi(x)$  and  $x_0 = \arg \min_x \phi(x)$ .

Summing (22) and (25), we have

$$\alpha\text{-REG}^y + \alpha\text{-REG}^x \leq \alpha_0 \mu L_0 \|x^* - x_0\| + \sum_{t=1}^T \left( \frac{2L\alpha_t^2}{\bar{A}_t} - \frac{\mu \tilde{A}_{t-1}}{2} \right) \|x_{t-1} - x_t\|^2. \quad (26)$$

We want to let the distance terms cancel out.

$$\frac{2L\alpha_t^2}{\bar{A}_t} - \frac{\mu \tilde{A}_{t-1}}{2} \leq 0, \quad (27)$$

which is equivalent to

$$\begin{aligned}
4L\alpha_t^2 &\leq \mu\tilde{A}_t\tilde{A}_{t-1} - \mu\alpha_0\tilde{A}_{t-1}. \\
4L\frac{\alpha_t^2}{\tilde{A}_t^2} &\leq \mu\frac{\tilde{A}_{t-1}}{\tilde{A}_t} - \mu\alpha_0\frac{\tilde{A}_{t-1}}{\tilde{A}_t}\frac{1}{\tilde{A}_t} \\
4L\frac{\alpha_t^2}{\tilde{A}_t^2} &\leq \mu(1 - \frac{\alpha_0}{\tilde{A}_t})(1 - \frac{\alpha_t}{\tilde{A}_t})
\end{aligned} \tag{28}$$

Let us denote the constant  $\theta := \frac{\alpha_t}{\tilde{A}_t} > 0$ .

$$\theta^2 + \frac{\mu}{4L}(1 - \frac{\alpha_0}{\tilde{A}_t})\theta - \frac{\mu}{4L}(1 - \frac{\alpha_0}{\tilde{A}_t}) \leq 0. \tag{29}$$

Notice that  $0 < \frac{\alpha_0}{\tilde{A}_t} \leq 1$ . It suffices to show that

$$\theta^2 + \frac{\mu}{4L}(1 - \frac{\alpha_0}{\tilde{A}_t})\theta - \frac{\mu}{4L} \leq 0. \tag{30}$$

Yet, we would expect that  $\frac{\alpha_0}{\tilde{A}_t}$  is a decreasing function of  $t$ , so it suffices to show that

$$\theta^2 + \frac{\mu}{4L}(1 - \frac{\alpha_0}{\tilde{A}_1})\theta - \frac{\mu}{4L} \leq 0, \tag{31}$$

which is equivalent to

$$\begin{aligned}
\theta^2 + \frac{\mu}{4L}\frac{\alpha_1}{\tilde{A}_1}\theta - \frac{\mu}{4L} &\leq 0 \\
\theta^2(1 + \frac{\mu}{4L}) - \frac{\mu}{4L} &\leq 0.
\end{aligned} \tag{32}$$

It turns out that  $\theta = \sqrt{\frac{\mu}{6L}} = \frac{1}{\sqrt{6\kappa}}$  satisfies the above inequality, combining the fact that  $\frac{\mu}{L} \leq 1$ .

Therefore, the optimization error  $\epsilon$  after  $T$  iterations is

$$\begin{aligned}
\epsilon &\leq \frac{\alpha\text{-REG}^y + \alpha\text{-REG}^x}{A_T} \leq \frac{1}{A_1} \frac{A_1}{A_2} \dots \frac{A_{T-1}}{A_T} (\alpha_0\mu L_0 \|x^* - x_0\|) \\
&= \frac{1}{A_1} (1 - \frac{\alpha_2}{A_2}) \dots (1 - \frac{\alpha_T}{A_T}) (\alpha_0\mu L_0 \|x^* - x_0\|) \\
&\leq \frac{1}{A_1} (1 - \frac{\alpha_2}{\tilde{A}_2}) \dots (1 - \frac{\alpha_T}{\tilde{A}_T}) (\alpha_0\mu L_0 \|x^* - x_0\|) \\
&\leq (1 - \frac{1}{\sqrt{6\kappa}})^{T-1} \frac{\alpha_0\mu L_0}{A_1} \|x^* - x_0\|.
\end{aligned} \tag{33}$$

which is  $O((1 - \frac{1}{\sqrt{6\kappa}})^T) = O(\exp(-\frac{1}{\sqrt{6\kappa}}T))$ .

□

*Proof.* (of (25)) First, we are going to use induction to show that

$$\sum_{t=0}^{\tau} \alpha_t \ell_t(x_t) - \alpha_t \ell_t(x^*) \leq D_\tau, \tag{34}$$

for any  $x^* \in \mathcal{X}$ , where  $D_\tau := -\sum_{t=1}^{\tau} \frac{\mu\tilde{A}_{t-1}}{2} \|x_{t-1} - x_t\|^2$ .

For the base case  $t = 0$ , we have

$$\alpha_0\mu\phi(x_0) - \alpha_0\mu\phi(x^*) \leq 0 = D_0, \tag{35}$$

where  $x_0$  is defined as  $x_0 = \arg \min_{x \in \mathcal{X}} \alpha_0\mu\phi(x)$ .

Now suppose it holds at  $t = \tau - 1$ .

$$\begin{aligned}
\sum_{t=0}^{\tau} \alpha_t \ell_t(x_t) &\stackrel{(a)}{\leq} D_{\tau-1} + \alpha_{\tau} \ell_{\tau}(x_{\tau}) + \sum_{t=0}^{\tau-1} \alpha_t \ell_t(x_{\tau-1}) \\
&\stackrel{(b)}{\leq} D_{\tau-1} + \alpha_{\tau} \ell_{\tau}(x_{\tau}) + \sum_{t=0}^{\tau-1} \alpha_t \ell_t(x_{\tau}) - \frac{\tilde{A}_{\tau-1}\mu}{2} \|x_{\tau-1} - x_{\tau}\|^2 \\
&= D_{\tau-1} + \sum_{t=0}^{\tau} \alpha_t \ell_t(x_{\tau}) - \frac{\tilde{A}_{\tau-1}\mu}{2} \|x_{\tau-1} - x_{\tau}\|^2 \\
&= D_{\tau} + \sum_{t=0}^{\tau} \alpha_t \ell_t(x_{\tau}) \\
&\leq D_{\tau} + \sum_{t=0}^{\tau} \alpha_t \ell_t(x^*),
\end{aligned} \tag{36}$$

for any  $x^* \in \mathcal{X}$ , where (a) we use the induction and we let the point  $x^* = x_{\tau-1}$  and (b) is by the strongly convexity and that  $x_{\tau-1} = \arg \min_x \sum_{t=0}^{\tau-1} \alpha_t \ell_t(x)$  so that  $\sum_{t=0}^{\tau-1} \alpha_t \ell_t(x_{\tau-1}) \leq \sum_{t=0}^{\tau-1} \alpha_t \ell_t(x_{\tau}) - \frac{\tilde{A}_{\tau-1}\mu}{2} \|x_{\tau-1} - x_{\tau}\|^2$  as  $\sum_{t=0}^{\tau-1} \alpha_t \ell_t(x)$  is at least  $\frac{\tilde{A}_{\tau-1}\mu}{2}$ -strongly convex. We have completed the proof of (34). By (34), we have

$$\begin{aligned}
\alpha\text{-REG}^x &:= \sum_{t=1}^T \alpha_t \ell_t(x_t) - \alpha_t \ell_t(x^*) \leq \alpha_0 \mu \phi(x^*) - \alpha_0 \mu \phi(x_0) - \sum_{t=1}^T \frac{\mu \tilde{A}_{t-1}}{2} \|x_{t-1} - x_t\|^2 \\
&\leq \alpha_0 \mu L_0 \|x_0 - x^*\| - \sum_{t=1}^T \frac{\mu \tilde{A}_{t-1}}{2} \|x_{t-1} - x_t\|^2,
\end{aligned} \tag{37}$$

where we assume that  $\phi(\cdot)$  is  $L_0$ -Lipchitz.

□

## I Analysis of Accelerated Proximal Method

First, we need a stronger result.

**Lemma** [Property 1 in [6]] *For any proper lower semi-continuous convex function  $\theta(x)$ , let  $x^+ = \arg \min_{x \in \mathcal{K}} \theta(x) + V_c(x)$ . Then, it satisfies that for any  $x^* \in \mathcal{K}$ ,*

$$\theta(x^+) - \theta(x^*) \leq V_c(x^*) - V_{x^+}(x^*) - V_c(x^+). \tag{38}$$

*Proof.* The statement and its proof has also appeared in [2] and [4]. For completeness, we replicate the proof here. Recall that the Bregman divergence with respect to the distance generating function  $\phi(\cdot)$  at a point  $c$  is:  $V_c(x) := \phi(x) - \langle \nabla \phi(c), x - c \rangle - \phi(c)$ .

Denote  $F(x) := \theta(x) + V_c(x)$ . Since  $x^+$  is the optimal point of  $\arg \min_{x \in K} F(x)$ , by optimality,

$$\langle x^* - x^+, \nabla F(x^+) \rangle = \langle x^* - x^+, \partial \theta(x^+) + \nabla \phi(x^+) - \nabla \phi(c) \rangle \geq 0, \tag{39}$$

for any  $x^* \in K$ .

Now using the definition of subgradient, we also have

$$\theta(x^*) \geq \theta(x^+) + \langle \partial \theta(x^+), x^* - x^+ \rangle. \tag{40}$$

By combining (39) and (40), we have

$$\begin{aligned}
\theta(x^*) &\geq \theta(x^+) + \langle \partial \theta(x^+), x^* - x^+ \rangle \\
&\geq \theta(x^+) + \langle x^* - x^+, \nabla \phi(c) - \nabla \phi(x^+) \rangle \\
&= \theta(x^+) - \{ \phi(x^*) - \langle \nabla \phi(c), x^* - c \rangle - \phi(c) \} + \{ \phi(x^*) - \langle \nabla \phi(x^+), x^* - x^+ \rangle - \phi(x^+) \} \\
&\quad + \{ \phi(x^+) - \langle \nabla \phi(c), x^+ - c \rangle - \phi(c) \} \\
&= \theta(x^+) - V_c(x^*) + V_{x^+}(x^*) + V_c(x^+)
\end{aligned} \tag{41}$$



□

Recall MIRRORDESCENT's update  $x_t = \operatorname{argmin}_x \gamma_t(\alpha_t h_t(x)) + V_{x_{t-1}}(x)$ , where  $h_t(x) = \langle x, y_t \rangle + \psi(x)$ . Using the lemma with  $\theta(x) = \gamma_t(\alpha_t h_t(x))$ ,  $x^+ = x_t$  and  $c = x_{t-1}$  we have that

$$\gamma_t(\alpha_t h_t(x_t)) - \gamma_t(\alpha_t h_t(x^*)) = \theta(x_t) - \theta(x^*) \leq V_{x_{t-1}}(x^*) - V_{x_t}(x^*) - V_{x_{t-1}}(x_t). \quad (42)$$

Therefore, we have that

$$\begin{aligned} \alpha\text{-REG}^x &:= \sum_{t=1}^T \alpha_t h_t(x_t) - \min_{x \in \mathcal{X}} \sum_{t=1}^T \alpha_t h_t(x) \\ &\stackrel{(42)}{\leq} \sum_{t=1}^T \frac{1}{\gamma_t} (V_{x_{t-1}}(x^*) - V_{x_t}(x^*) - V_{x_{t-1}}(x_t)) \\ &= \frac{1}{\gamma_1} V_{x_0}(x^*) - \frac{1}{\gamma_T} V_{x_T}(x^*) + \sum_{t=1}^{T-1} \left( \frac{1}{\gamma_{t+1}} - \frac{1}{\gamma_t} \right) V_{x_t}(x^*) - \frac{1}{\gamma_t} V_{x_{t-1}}(x_t) \\ &\stackrel{(a)}{\leq} \frac{1}{\gamma_1} D + \sum_{t=1}^{T-1} \left( \frac{1}{\gamma_{t+1}} - \frac{1}{\gamma_t} \right) D - \frac{1}{\gamma_t} V_{x_{t-1}}(x_t) = \frac{D}{\gamma_T} - \sum_{t=1}^T \frac{1}{\gamma_t} V_{x_{t-1}}(x_t) \\ &\stackrel{(b)}{\leq} \frac{D}{\gamma_T} - \sum_{t=1}^T \frac{1}{2\gamma_t} \|x_{t-1} - x_t\|^2, \end{aligned} \quad (43)$$

where (a) holds since the sequence  $\{\gamma_t\}$  is non-increasing and  $D$  upper bounds the divergence terms, and (b) follows from the strong convexity of  $\phi$ , which grants  $V_{x_{t-1}}(x_t) \geq \frac{1}{2} \|x_t - x_{t-1}\|^2$ . Now we see that following the same lines as the proof in Section 3. We get that  $\bar{x}_T$  is an  $O(\frac{1}{T^2})$  approximate optimal solution.

## J Accelerated FRANKWOLFE

---

**Algorithm 1** A new FW algorithm [[1]]

---

- 1: In the weighted loss setting of Algorithm 1:
  - 2: **for**  $t = 1, 2, \dots, T$  **do**
  - 3:      $y$ -player uses OPTIMISITCFTL as  $\text{OAlg}^x$ :  $y_t = \nabla f(\tilde{x}_t)$ .
  - 4:      $x$ -player uses BETHEREGULARIZEDLEADER with  $R(X) := \frac{1}{2} \gamma_{\mathcal{K}}(x)^2$  as  $\text{OAlg}^x$ :
  - 5:     Set  $(\hat{x}_t, \rho_t) = \operatorname{argmin}_{x \in \mathcal{K}, \rho \in [0, 1]} \sum_{s=1}^t \rho \langle x, \alpha_s y_s \rangle + \frac{1}{\eta} \rho^2$  and play  $x_t = \rho_t \hat{x}_t$ .
  - 6: **end for**
- 

[1] proposed a FRANKWOLFE like algorithm that not only requires a linear oracle but also enjoys  $O(1/T^2)$  rate on all the known examples of strongly convex constraint sets that contain the origin, like  $l_p$  ball and Schatten  $p$  ball with  $p \in (1, 2]$ . Their analysis requires the assumption that the underlying function is also strongly-convex to get the fast rate. To describe their algorithm, denote  $\mathcal{K}$  be any closed convex set that contains the origin. Define “gauge function” of  $\mathcal{K}$  as  $\gamma_{\mathcal{K}}(x) := \inf\{c \geq 0 : \frac{x}{c} \in \mathcal{K}\}$ . Notice that, for a closed convex  $\mathcal{K}$  that contains the origin,  $\mathcal{K} = \{x \in \mathbb{R}^d : \gamma_{\mathcal{K}}(x) \leq 1\}$ . Furthermore, the boundary points on  $\mathcal{K}$  satisfy  $\gamma_{\mathcal{K}}(x) = 1$ .

[1] showed that the squared of a gauge function is strongly convex on the underlying  $\mathcal{K}$  for all the known examples of strongly convex sets that contain the origin. Algorithm 1 is the algorithm. Clearly, Algorithm 1 is an instance of the meta-algorithm. We want to emphasize again that our analysis does not need the function  $f(\cdot)$  to be strongly convex to show  $O(1/T^2)$  rate. We’ve improved their analysis.

## K Proof of Theorem 1

For completeness, we replicate the proof by [1] here.

**Theorem 1** Assume a  $T$ -length sequence  $\alpha$  are given. Suppose in Algorithm 1 the online learning algorithms  $OAlg^x$  and  $OAlg^y$  have the  $\alpha$ -weighted average regret  $\overline{\alpha\text{-REG}}^x$  and  $\overline{\alpha\text{-REG}}^y$  respectively. Then the output  $(\bar{x}_T, \bar{y}_T)$  is an  $\epsilon$ -equilibrium for  $g(\cdot, \cdot)$ , with  $\epsilon = \overline{\alpha\text{-REG}}^x + \overline{\alpha\text{-REG}}^y$ .

*Proof.* Suppose that the loss function of the  $x$ -player in round  $t$  is  $\alpha_t h_t(\cdot) : \mathcal{X} \rightarrow \mathbb{R}$ , where  $h_t(\cdot) := g(\cdot, y_t)$ . The  $y$ -player, on the other hand, observes her own sequence of loss functions  $\alpha_t \ell_t(\cdot) : \mathcal{Y} \rightarrow \mathbb{R}$ , where  $\ell_t(\cdot) := -g(x_t, \cdot)$ .

$$\begin{aligned}
 \frac{1}{\sum_{s=1}^T \alpha_s} \sum_{t=1}^T \alpha_t g(x_t, y_t) &= \frac{1}{\sum_{s=1}^T \alpha_s} \sum_{t=1}^T -\alpha_t \ell_t(y_t) \\
 &= -\frac{1}{\sum_{s=1}^T \alpha_s} \inf_{y \in \mathcal{Y}} \left\{ \sum_{t=1}^T \alpha_t \ell_t(y) \right\} - \frac{\alpha\text{-REG}^y}{\sum_{s=1}^T \alpha_s} \\
 &= \sup_{y \in \mathcal{Y}} \left\{ \frac{1}{\sum_{s=1}^T \alpha_s} \sum_{t=1}^T \alpha_t g(x_t, y) \right\} - \overline{\alpha\text{-REG}}^y \\
 \text{(Jensen)} \quad &\geq \sup_{y \in \mathcal{Y}} g\left(\frac{1}{\sum_{s=1}^T \alpha_s} \sum_{t=1}^T \alpha_t x_t, y\right) - \overline{\alpha\text{-REG}}^y \quad (44)
 \end{aligned}$$

$$\begin{aligned}
 &= \sup_{y \in \mathcal{Y}} g(\bar{x}_T, y) - \overline{\alpha\text{-REG}}^y \quad (45) \\
 &\geq \inf_{x \in \mathcal{X}} \sup_{y \in \mathcal{Y}} g(x, y) - \overline{\alpha\text{-REG}}^y
 \end{aligned}$$

Let us now apply the same argument on the right hand side, where we use the  $x$ -player's regret guarantee.

$$\begin{aligned}
 \frac{1}{\sum_{s=1}^T \alpha_s} \sum_{t=1}^T \alpha_t g(x_t, y_t) &= \frac{1}{\sum_{s=1}^T \alpha_s} \sum_{t=1}^T \alpha_t h_t(x_t) \\
 &= \left\{ \sum_{t=1}^T \frac{1}{\sum_{s=1}^T \alpha_s} \alpha_t h_t(x) \right\} + \frac{\alpha\text{-REG}^x}{\sum_{s=1}^T \alpha_s} \\
 &= \left\{ \sum_{t=1}^T \frac{1}{\sum_{s=1}^T \alpha_s} \alpha_t g(x^*, y_t) \right\} + \overline{\alpha\text{-REG}}^x \\
 &\leq g\left(x^*, \sum_{t=1}^T \frac{1}{\sum_{s=1}^T \alpha_s} \alpha_t y_t\right) + \overline{\alpha\text{-REG}}^x \quad (46)
 \end{aligned}$$

$$\begin{aligned}
 &= g(x^*, \bar{y}_T) + \overline{\alpha\text{-REG}}^x \quad (47) \\
 &\leq \sup_{y \in \mathcal{Y}} g(x^*, y) + \overline{\alpha\text{-REG}}^x
 \end{aligned}$$

Note that  $\sup_{y \in \mathcal{Y}} g(x^*, y) = f(x^*)$  be the definition of the game  $g(\cdot, \cdot)$  and by Fenchel conjugacy, hence we can conclude that  $\sup_{y \in \mathcal{Y}} g(x^*, y) = \inf_{x \in \mathcal{X}} \sup_{y \in \mathcal{Y}} g(x, y) = V^* = \sup_{y \in \mathcal{Y}} \inf_{x \in \mathcal{X}} g(x, y)$ . Combining (45) and (47), we see that:

$$\sup_{y \in \mathcal{Y}} g(\bar{x}_T, y) - \overline{\alpha\text{-REG}}^y \leq \inf_{x \in \mathcal{X}} g(x, \bar{y}_T) + \overline{\alpha\text{-REG}}^x$$

which implies that  $(\bar{x}_T, \bar{y}_T)$  is an  $\epsilon = \overline{\alpha\text{-REG}}^x + \overline{\alpha\text{-REG}}^y$  equilibrium.  $\square$

## References

- [1] Jacob Abernethy, Kfir Levy, Kevin Lai, and Jun-Kun Wang. Faster rates for convex-concave games. *COLT*, 2018.

- [2] Gong Chen and Marc Teboulle. Convergence analysis of a proximal-like minimization algorithm using bregman functions. SIAM Journal on Optimization, 1993.
- [3] Sham Kakade and Shai Shalev-Shwartz. Mind the duality gap: Logarithmic regret algorithms for online optimization. NIPS, 2009.
- [4] Guanghai Lan, Zhaosong Lu, and Renato D. C. Monteiro. Primal-dual first-order methods with  $o(1/\epsilon)$  iteration-complexity for cone programming. Mathematical Programming, 2011.
- [5] Alexander Rakhlin and Karthik Sridharan. Optimization, learning, and games with predictable sequences. NIPS, 2013.
- [6] Paul Tseng. On accelerated proximal gradient methods for convex-concave optimization. 2008.
